# Supplementary material for: Phylogenetic classification of the world’s tropical forests
Source: PubMed Central journal article supplement — Proc Natl Acad Sci U S A. 2018 Feb 5;115(8):1837–42. doi: 10.1073/pnas.1714977115 (PMC5828595; doi:10.1073/pnas.1714977115), 2018-02-05
Supplement: pnas.201714977SI.pdf [file pnas.201714977SI.pdf]

# Supporting Information

Slik et al. 10.1073/pnas.1714977115

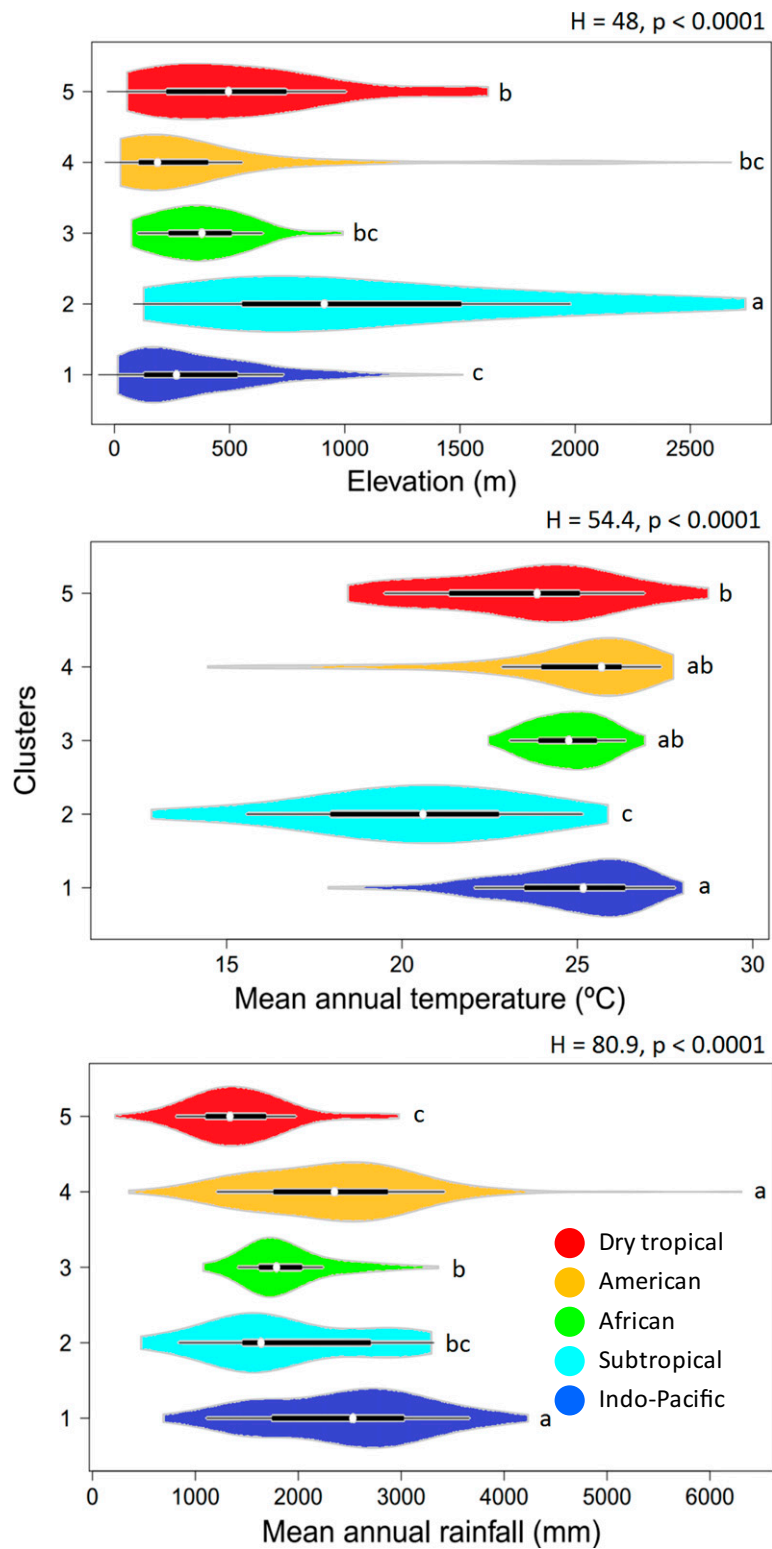

**Fig. S1.** Elevation and climatic variables (temperature and rainfall) of each of the five floristic clusters. Each violin plot indicates the probability density of the data at different values, the median (white dots), first and third quartiles (black thick lines), and range. Climate data were taken from WorldClim (32). Overall differences between clusters were tested with Kruskal–Wallis ( $H$ ) test. The differences between pairs of clusters were assessed with Mann–Whitney tests with Bonferroni-corrected  $P$  values (indicated with different letters in each plot). Sample sizes: Indo-Pacific, 138; Subtropical, 34; African, 46; American, 105; Dry, 69.

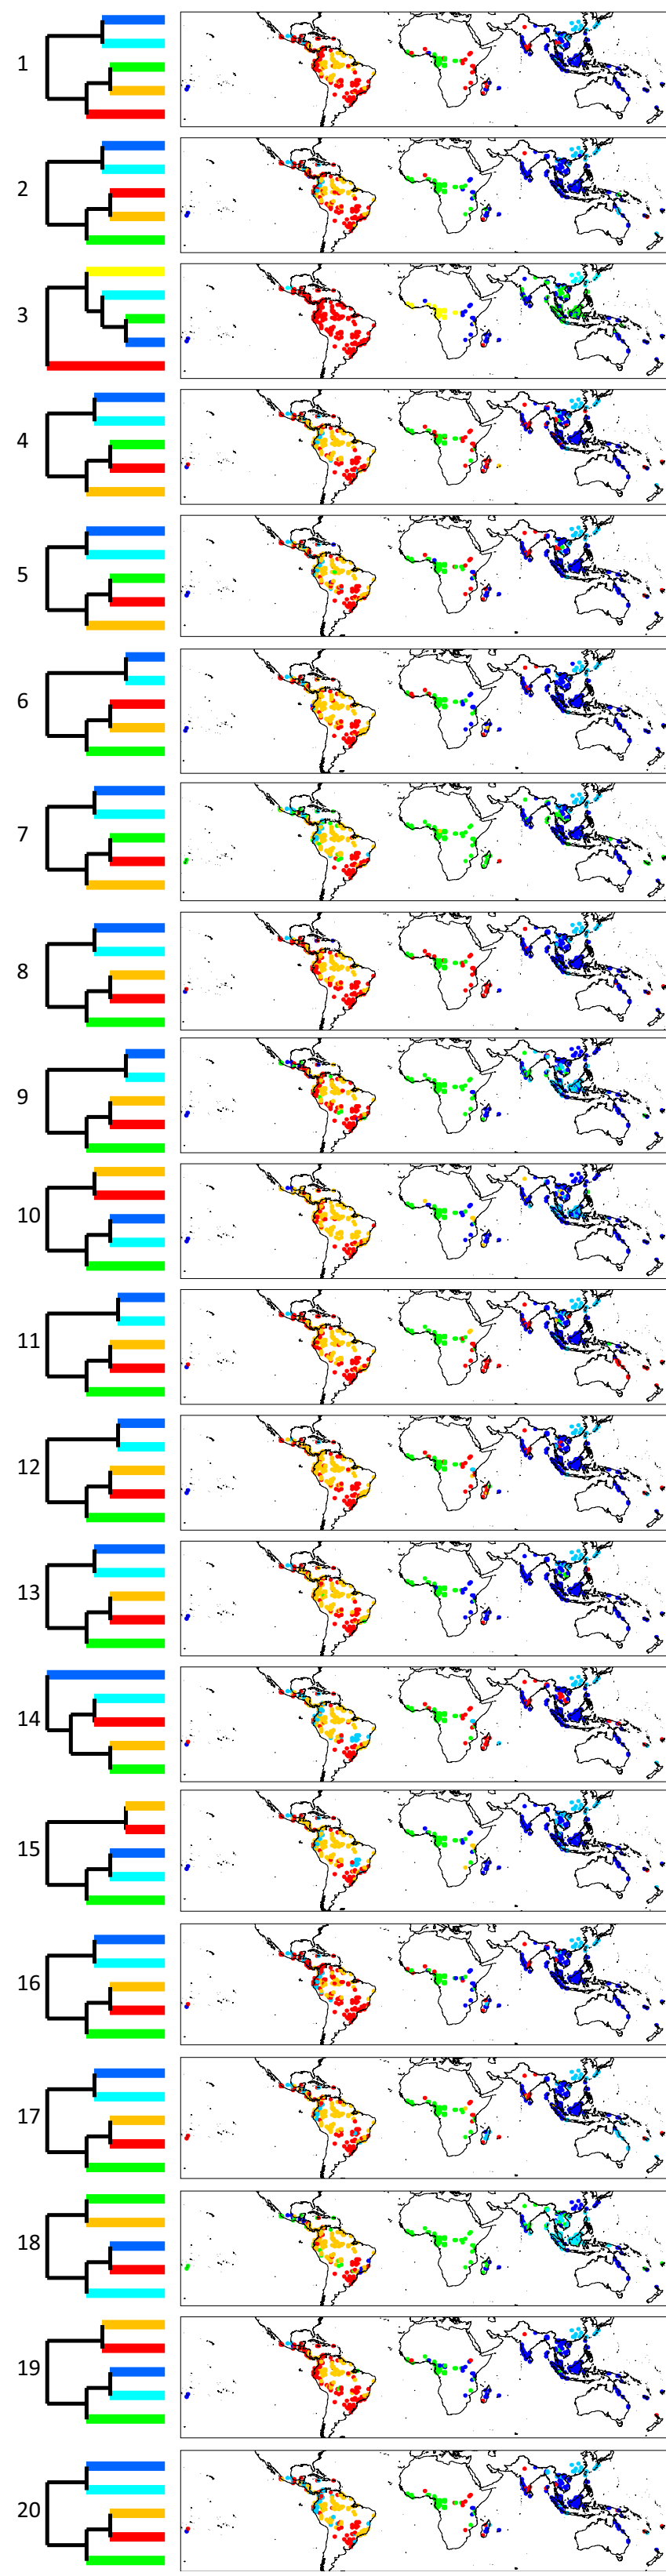

Fig. S2. Clustering results for the 20 datasets based on mean nearest taxon distance (MNTD). Each dataset is based on a random draw of 20 taxa for each location ( $n = 406$ ).



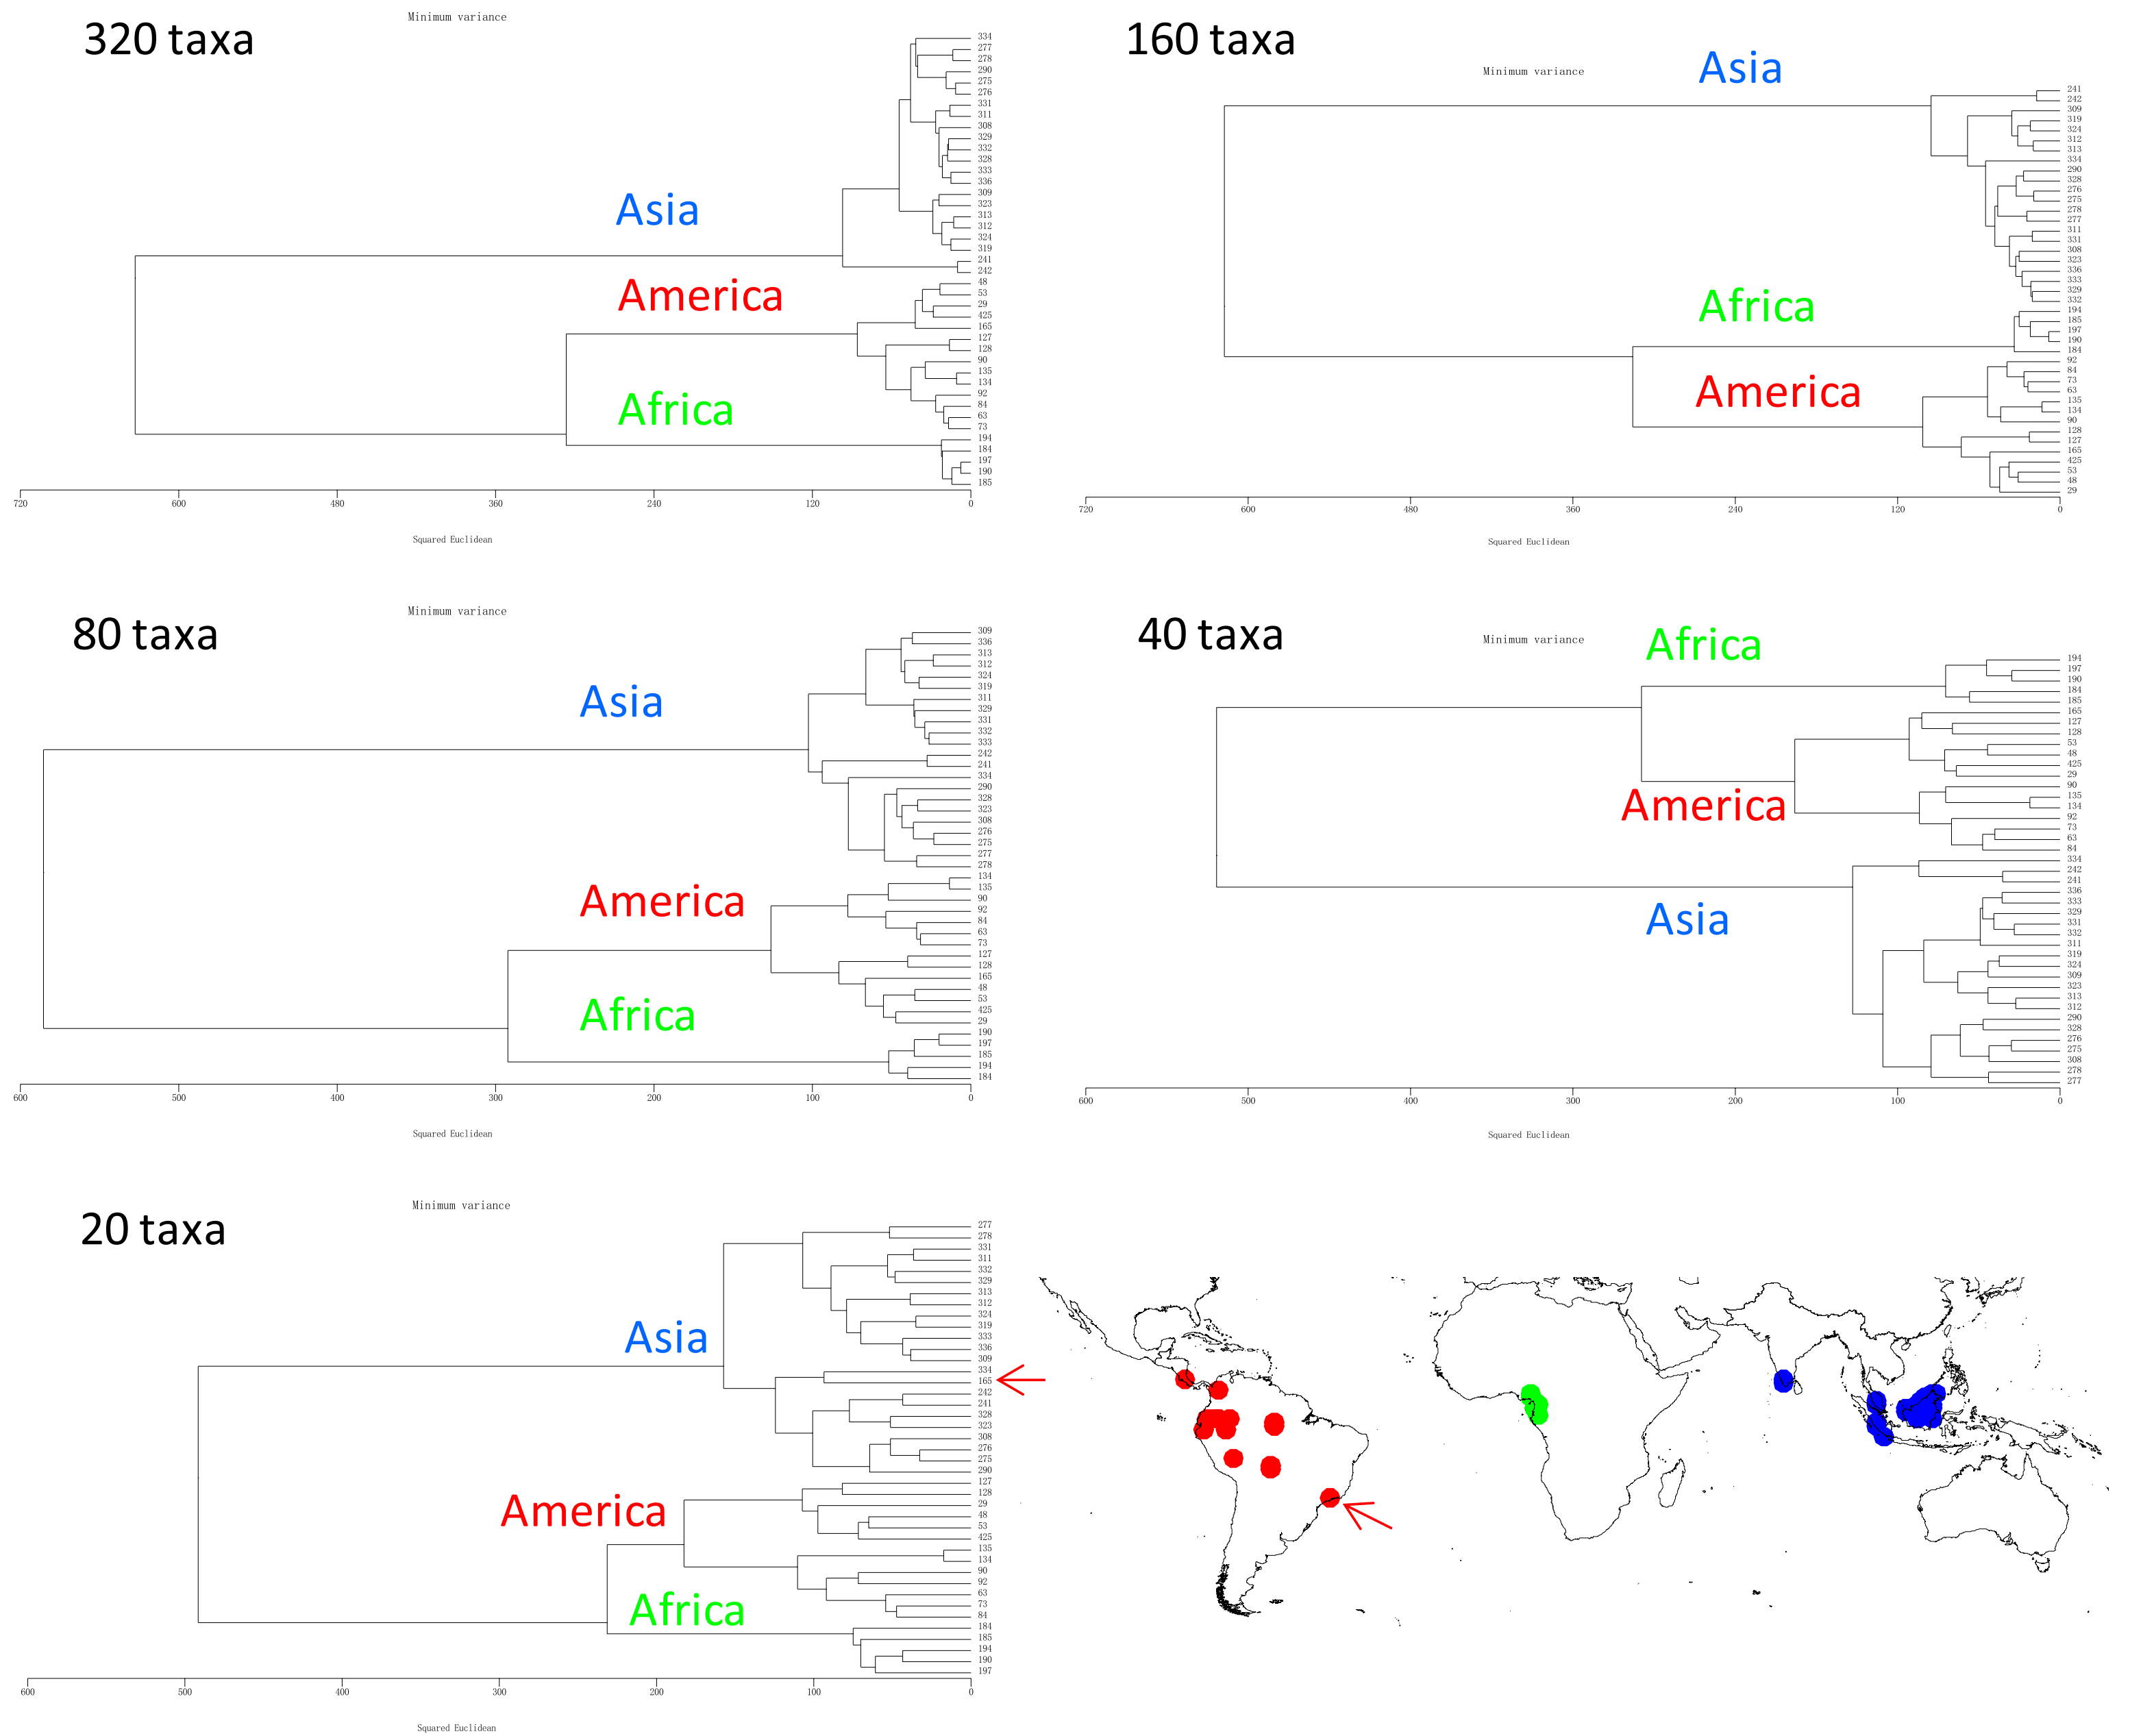

Fig. S5. Cluster results for 41 locations (indicated in Lower Right map) using decreasing numbers of taxa per location (320, 160, 80, 40, and 20 from Top to Bottom). All analyses recovered the same three main groups of locations in the same configuration (African and American versus Asian locations), although one American location (indicated with a red arrow) was grouped with the Asian cluster in the 20-taxon analysis.

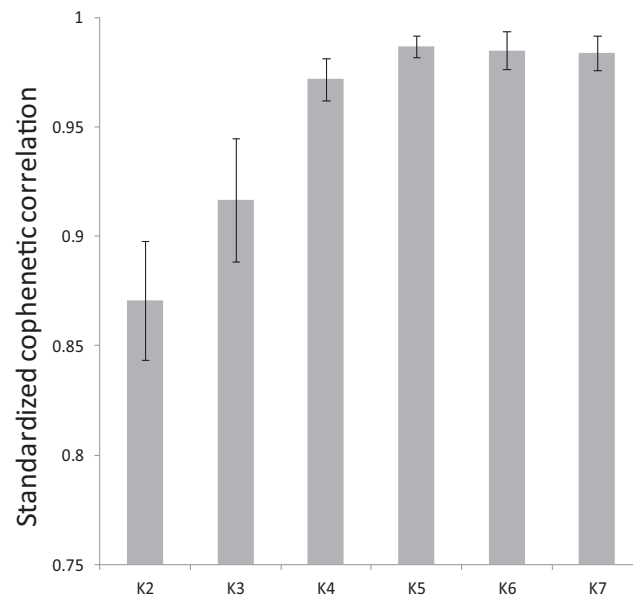

**Fig. S6.** Standardized cophenetic correlation coefficients for cluster levels K2 to K7 (mean with 95% confidence intervals of 20 cluster analyses). Cophenetic correlation coefficients show how well the distance data in the original data matrix fit the cluster dendrogram, that is, the higher the value, the better the fit. Cophenetic correlation increased to cluster level 5 (K5).

## Other Supporting Information Files

[Table S1 \(DOCX\)](#)

[Dataset S1 \(DOCX\)](#)
